# Supplementary material for: Quantifying changes in respiratory syncytial virus—associated hospitalizations among children in Texas during COVID-19 pandemic using records from 2006 to 2021
Source: Frontiers journal article supplement (doi:10.3389/fped.2023.1124316), 2023-03-13
Supplement: Data_Sheet_1.PDF [file Data_Sheet_1.PDF]

## *Supplementary Material*

**Table S1** Codes from ICD-9-CM and ICD-10-CM used to select respiratory syncytial virus (RSV) cases

|                                                                           |                                                                                                                                                                                                |
|---------------------------------------------------------------------------|------------------------------------------------------------------------------------------------------------------------------------------------------------------------------------------------|
| ICD-9-CM codes<br>for selecting RSV<br>cases from 2006<br>Q1 to 20015 Q3  | <div>079.6 RSV</div> <div>466.11 Acute bronchiolitis due RSV</div> <div>480.1 Pneumonia due to RSV</div>                                                                                       |
| ICD-10-CM codes<br>for selecting RSV<br>cases from 2015<br>Q4 to 20020 Q4 | <div>B97.4 RSV as the cause of diseases classified elsewhere</div> <div>J20.5 Acute bronchitis due to RSV</div> <div>J21.0 Acute bronchiolitis due to RSV</div> <div>J12.1 RSV pneumonia</div> |

**Table S2** Total number of RSV cases (hospital admission percentage) collected from 2006 to 2019, 2020 and 2021.

| <b>Age</b>  | <b>2006-2019</b> | <b>2020</b>   | <b>2021</b>   |
|-------------|------------------|---------------|---------------|
| 1-28 days   | 9 982(6.97)      | 197 (5.08)    | 526 (4.42)    |
| 29-365 days | 84 788 (59.24)   | 1 664 (42.92) | 5 458 (45.83) |
| 1-4 years   | 33 889 (23.68)   | 697 (17.98)   | 3 435 (28.84) |
| >4 years    | 14 475 (10.11)   | 1 319 (34.02) | 2 490 (20.91) |

**Table S3** Total number of RSV cases (hospital admission percentage) collected for patients under 5 years of age from 2006 to 2019, 2020 and 2021.

| Average 2006-2019 |              |             |              |              |
|-------------------|--------------|-------------|--------------|--------------|
| Age               | Q1           | Q2          | Q3           | Q4           |
| 1-28 days         | 395 (8.23)   | 26 (7.28)   | 12 (7.69)    | 278 (7.18)   |
| 29-365 days       | 3229 (67.27) | 240 (67.23) | 93 (59.62)   | 2492 (64.38) |
| 1-4 years         | 1176 (24.50) | 91 (25.49)  | 51 (32.69)   | 1101 (28.44) |
| 2020              |              |             |              |              |
| 1-28 days         | 189 (7.76)   | 0 (0)       | 4 (16.67)    | 4 (9.3)      |
| 29-365 days       | 1589 (65.26) | 42(75)      | 7 (29.17)    | 26 (60.57)   |
| 1-4 years         | 657 (26.98)  | 14 (25)     | 13 (54.17)   | 13 (30.23)   |
| 2021              |              |             |              |              |
| 1-28 days         | 20 (54.05)   | 682 (55.76) | 3357(58.55)  | 1399 (57.69) |
| 29-365 days       | 0 (0)        | 44 (3.6)    | 341 (5.95)   | 141 (5.81)   |
| 1-4 years         | 17 (45.95)   | 497 (40.64) | 2036 (35.51) | 885 (36.49)  |

### Linear model of hospital admissions for each quarter

We grouped hospital admissions by calendar quarter and generated a linear regression model as follows:

$$HA_q = \beta_q + \alpha_q t \quad \text{Eq. S1}$$

where  $HA_q$  is the number of hospital admissions and  $t$  is the year (2006=1 to 2019=14),  $\beta_q$  is the intercept and  $\alpha_q$  is the quarterly temporal trend.

We used the following linear model function in R: `lmodel <- lm(hosp ~ t, data = DF_Q1)`, where `hosp` is the number of hospitalizations, `t` is the year (2006=1 to 2019=14), and `DF_Q1` is the data frame containing values for quarter 1.

Results for each model are reported in Table S4. The plot of all models incorporated in an overall seasonal trend can be found in Figure S1.

**Table S4** Values of the linear model coefficients for each linear model

| Coefficient | value   | p-value |
|-------------|---------|---------|
| $\beta_1$   | 5892.40 | ***     |
| $\alpha_1$  | -145.51 |         |
| $\beta_2$   | 258.67  | ***     |
| $\alpha_2$  | 13.24   | **      |
| $\beta_3$   | 80.74   | .       |
| $\alpha_3$  | 10.23   | .       |
| $\beta_4$   | 3620.81 | ***     |
| $\alpha_4$  | 33.67   |         |

Significance code 0 '\*\*\*' 0.001 '\*\*' 0.01 '\*' 0.05 '.' 0.1 ' ' 1

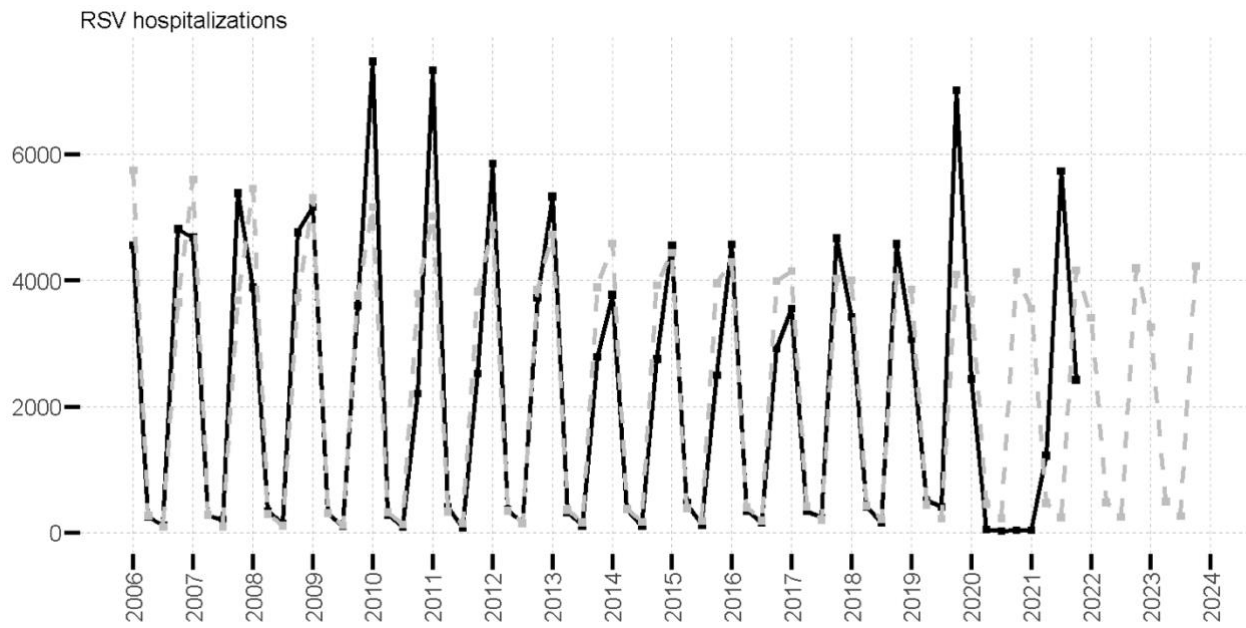

**Figure S1.** RSV hospitalizations, observed (black line) and predicted (gray dotted line). Values generated using Equation S1.

### Linear model of hospitalization rate at state level for each quarter

We generated hospitalization rates at a state level using the population of children four years of age or younger in the state of Texas as the denominator. The hospitalization rates follow a seasonal trend similar to the hospitalization numbers. We generated a linear regression model as described in the previous section (Eq. S1). Results for each model are in Table S5 and Figure S2.

**Table S5** Values of the linear model coefficients for each linear model

| Coefficient | value  | p-value |
|-------------|--------|---------|
| $\beta_1$   | 312.32 | ***     |
| $\alpha_1$  | -9.13  | .       |
| $\beta_2$   | 14.21  | ***     |
| $\alpha_2$  | 0.50   | *       |
| $\beta_3$   | 4.70   | *       |
| $\alpha_3$  | 0.42   | .       |
| $\beta_4$   | 198.77 | ***     |
| $\alpha_4$  | -0.54  |         |

Significance code 0 '\*\*\*' 0.001 '\*\*' 0.01 '\*' 0.05 '.' 0.1 ' ' 1

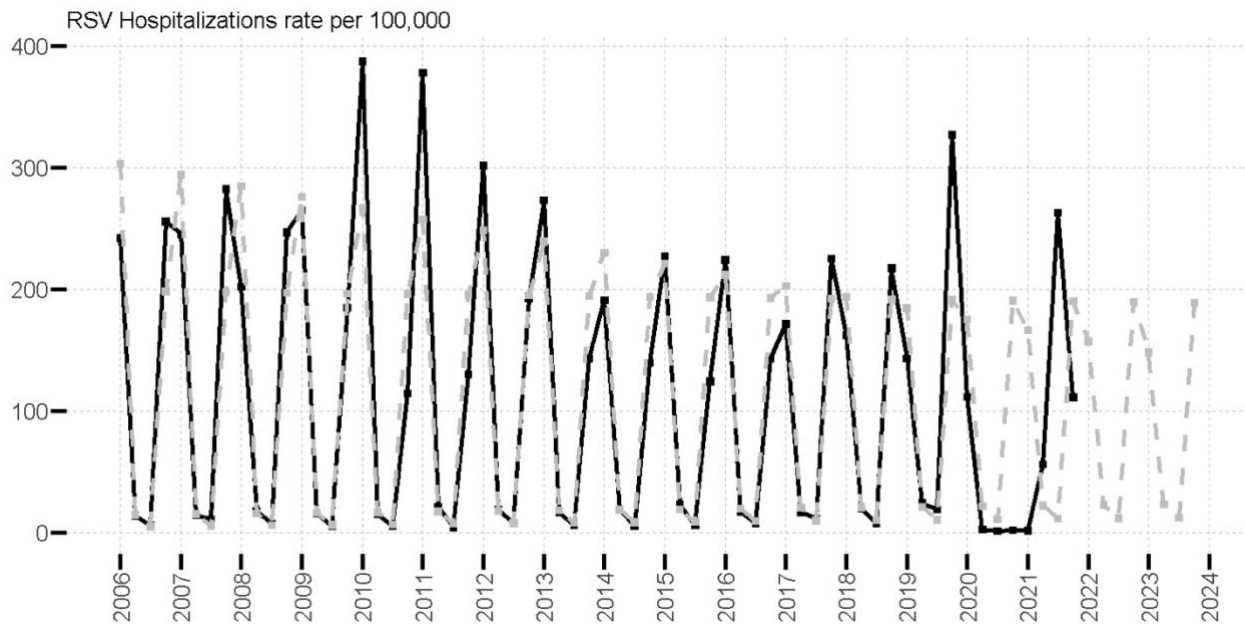

**Figure S2** Hospitalization rate at the state level, observed (black line) and predicted (gray dotted line). Values were generated using Equation S1.

**Table S6** Hospitalization rates (per 100,000) for patients under five years of age from RSV-NET and from our 2018 to 2021 dataset. RSV-NET does not have values for pediatric hospitalization rates prior to 2018.

| Year    | RSV-NET | PUDF state level | PUDF county level mean (CI) | PUDF state/ RSV-NET | PUDF county/ RSV-NET |
|---------|---------|------------------|-----------------------------|---------------------|----------------------|
| 2018    |         | 162.4            | 285.3(240.5-330.1)          |                     |                      |
| 2018.25 |         | 19.6             | 51.2(36.8-65.6)             |                     |                      |
| 2018.5  |         | 7.5              | 28.1(15.9-40.3)             |                     |                      |
| 2018.75 | 104.1   | 217.3            | 262.2(234.2-290.2)          | 2.1                 | 2.5                  |
| 2019    | 134.4   | 143.1            | 259.1(219.8-298.4)          | 1.1                 | 1.9                  |
| 2019.25 | 9.9     | 24.2             | 66.4(46.1-86.7)             | 2.4                 | 6.7                  |
| 2019.5  |         | 19.1             | 50.4(31.0-69.8)             |                     |                      |
| 2019.75 | 159.1   | 327.1            | 346.7(320.3-373.3)          | 2.1                 | 2.2                  |
| 2020    | 161.6   | 111.7            | 208.6(173.9-243.3)          | 0.7                 | 1.3                  |
| 2020.25 | 1.1     | 2.6              | 37.3(-1.5-76.1)             | 2.4                 | 33.9                 |
| 2020.5  |         | 1.1              | 10.9(0.8-21.0)              |                     |                      |
| 2020.75 | 0.4     | 2.0              | 17.3(4.8-29.8)              | 5.0                 | 43.3                 |
| 2021    | 1.9     | 1.7              | 10.8(3.6-18.0)              | 0.9                 | 5.7                  |
| 2021.25 | 30.8    | 56.1             | 113.2(96.3-130.1)           | 1.8                 | 3.7                  |
| 2021.5  | 144.3   | 263.0            | 310.9(280.0-341.8)          | 1.8                 | 2.2                  |
| 2021.75 |         | 111.2            | 198.5(167.6-229.4)          | 0.7                 | 1.3                  |
| 2022    | 31.2    |                  |                             |                     |                      |
| 2022.25 | 35.2    |                  |                             |                     |                      |
| 2022.5  | 95.7    |                  |                             |                     |                      |
| 2022.75 | 318.0   |                  |                             |                     |                      |



### Linear model of length of stay for each quarter

We generated statistical descriptions for the variable length of stay (LOS). For years 2006 to 2019 the median LOS was three days, which is consistent across quarters and years. However, LOS exceeded the median at six days in 2020 Q2 and 3.5 days in 2020 Q3. LOS decreased to two days in 2021 Q1. The LOS mean overall, however, followed a seasonal trend. Therefore, we generated a linear regression model as described in the previous section (Eq. S1). Results are in Table S7 and Figure S3.

**Table S7** Values of the linear model coefficients for each linear model

| Coefficient | value  | p-value |
|-------------|--------|---------|
| $\beta_1$   | 3.8908 | ***     |
| $\alpha_1$  | 0.0981 | ***     |
| $\beta_2$   | 7.0885 | ***     |
| $\alpha_2$  | 0.0917 |         |
| $\beta_3$   | 5.431  | **      |
| $\alpha_3$  | 0.283  |         |
| $\beta_4$   | 3.3463 | ***     |
| $\alpha_4$  | 0.0763 | ***     |

Significance code 0 '\*\*\*' 0.001 '\*\*' 0.01 '\*' 0.05 '.' 0.1 ' ' 1

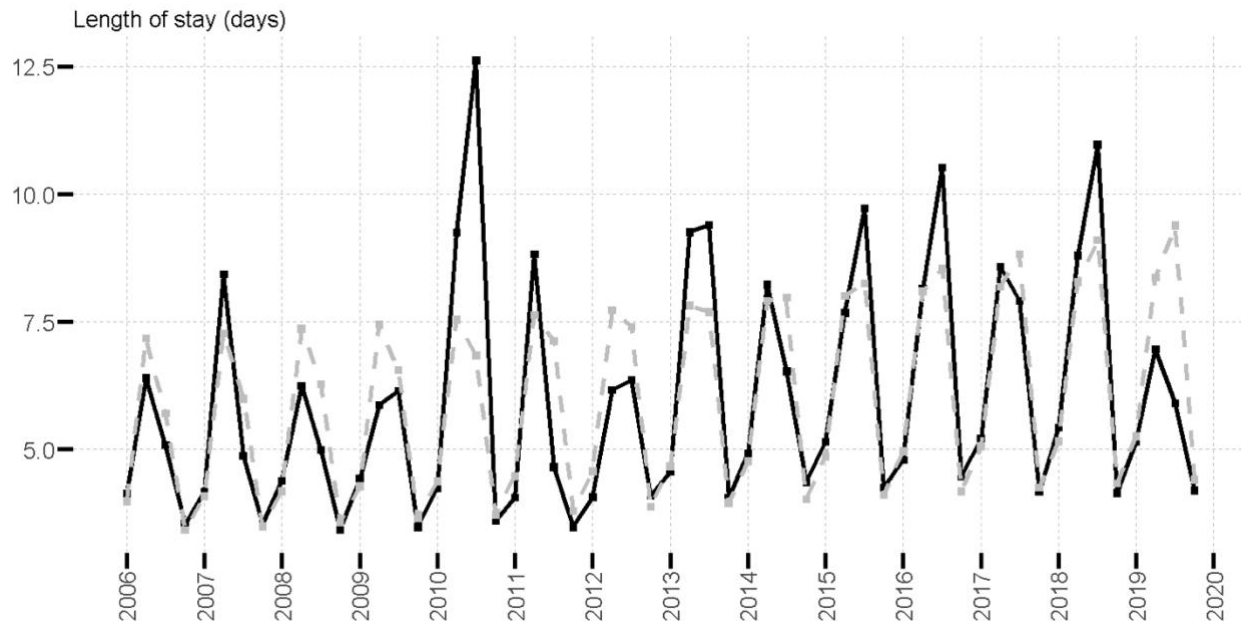

**Figure S3.** Length of stay (LOS), observed (black line) and predicted (gray dotted line). Values generated using Equation S1.

Table S8- Percentage of RSV cases (RSV discharge type/RSV hospitalizations) for patients five years of age or under grouped by status at the end of service (outcome).

| Year           | Left against        |         |                   |                    |         |       |
|----------------|---------------------|---------|-------------------|--------------------|---------|-------|
|                | Normal<br>discharge | Expired | medical<br>advice | Still a<br>patient | Hospice | Other |
| 2006           | 96.99               | 0.12    | 0.08              | 0.02               |         | 2.78  |
| 2007           | 97.29               | 0.13    | 0.08              | 0.08               | 0.01    | 2.42  |
| 2008           | 97.12               | 0.19    | 0.08              | 0.18               | 0.07    | 2.37  |
| 2009           | 97.14               | 0.14    | 0.11              | 0.09               | 0.12    | 2.40  |
| 2010           | 97.43               | 0.19    | 0.07              | 0.01               | 0.02    | 2.29  |
| 2011           | 97.16               | 0.14    | 0.06              | 0.01               | 0.05    | 2.59  |
| 2012           | 96.97               | 0.16    | 0.07              | 0.04               | 0.04    | 2.73  |
| 2013           | 97.26               | 0.22    | 0.02              | 0.19               | 0.02    | 2.28  |
| 2014           | 96.84               | 0.21    | 0.11              | 0.10               | 0.01    | 2.71  |
| 2015           | 97.32               | 0.25    | 0.05              | 0.05               | 0.04    | 2.29  |
| 2016           | 96.96               | 0.14    | 0.06              | 0.10               | 0.04    | 2.70  |
| 2017           | 96.86               | 0.24    | 0.10              | 0.02               | 0.01    | 2.76  |
| 2018           | 96.72               | 0.14    | 0.08              | 0.02               | 0.02    | 3.01  |
| 2019           | 96.98               | 0.14    | 0.11              |                    | 0.07    | 2.70  |
| 2020           | 96.01               | 0.39    | 0.20              |                    |         | 3.40  |
| 2021           | 97.15               | 0.13    | 0.12              | 0.03               | 0.04    | 2.53  |
| <b>Average</b> | 97.00               | 0.19    | 0.09              | 0.07               | 0.04    | 2.62  |
